# Supplementary material
Source: PubMed Central journal article supplement (PMC4035126)
Supplement: NIHMS543081-supplement-1.pdf [file NIHMS543081-supplement-1.pdf]

## 1 **Supplementary Information**

### 2 **Polar stalk synthesis in the *A. excentricus* *spmX*<sup>-</sup> mutant.**

3           Phosphate starvation of the *A. excentricus* *spmX* mutant causes the synthesis  
4 of polar stalks whereas it does not in wild-type cells. The most likely explanation for  
5 this effect is that, while the ancestral site remains and can be recognized, the native  
6 SpmX preferentially localizes to the new, subpolar, position. The preferential  
7 localization of the subpolar over the polar position in wild-type cells is probably due  
8 to the fact that the SpmX sequences mediating the interaction with the ancestral,  
9 polar, target have diverged and cannot recognize it as efficiently as the subpolar  
10 target, whose recognition is under selective pressure. This model is supported by  
11 the fact that *A. biprosthicum* SpmX can recognize both the polar and the subpolar  
12 targets in *A. excentricus*, presumably because the selective pressure maintaining the  
13 preferential subpolar target recognition in *A. excentricus* has been removed in *A.*  
14 *biprosthicum*, which synthesizes lateral stalks.

15

### 16 **Evolution of the SpmX C-terminal region**

17           To determine what region of SpmX evolved to specify the location of stalk  
18 synthesis, we constructed chimeric SpmX proteins by mixing and matching the  
19 muramidase and the C-terminal domains (intermediate region and transmembrane  
20 domains) of different SpmX proteins. First, we tested whether mutations in the C-  
21 terminal region of SpmX after the divergence of *Asticacaulis* and *Caulobacter*

22 resulted in its ability to drive stalk synthesis in *A. excentricus* (Fig. 1e). We expressed  
23 SpmX<sub>CC(P)</sub> in the *A. excentricus* *spmX*<sup>-</sup> mutant, which localized to the pole but failed to  
24 rescue stalk synthesis (Fig. 3b). Similarly, SpmX<sub>CC(P)</sub>-EGFP expressed in the *A.*  
25 *biprosthecum* *spmX*<sup>-</sup> mutant localized to the pole but failed to rescue stalk synthesis  
26 (Extended Data Fig. 9f). We then fused the *C. crescentus* SpmX muramidase domain  
27 with the C-terminal region of *A. excentricus* SpmX to generate SpmX<sub>CC(P)-AE(S)</sub> and  
28 expressed this chimera in wild-type and *spmX*<sup>-</sup> *A. excentricus*. The hybrid SpmX<sub>CC(P)-</sub>  
29 <sub>AE(S)</sub> was able to perform almost like SpmX<sub>AE(S)</sub>, being both able to induce multiple  
30 sub-polar stalk formation in the wild-type (Extended Data Fig. 4d) and rescue the  
31 synthesis of sub-polar stalks in the *spmX*<sup>-</sup> mutant (Fig. 3c, d). These results indicate  
32 that the evolution of the C-terminal region of SpmX is critical for its ability to drive  
33 sub-polar stalk synthesis in *A. excentricus*.

34 Next, we tested whether evolution of the C-terminal region led to the  
35 transition from sub-polar to bi-lateral stalk synthesis. We generated and expressed  
36 SpmX<sub>AB(L)-AE(S)</sub> and SpmX<sub>AE(S)-AB(L)</sub> in wild-type and *spmX*<sup>-</sup> *A. biprosthecum* and *A.*  
37 *excentricus*. Most notably, SpmX<sub>AB(L)-AE(S)</sub> functioned like SpmX<sub>AE(S)</sub>: it induced  
38 multiple sub-polar stalk synthesis in wild-type *A. excentricus* (Extended Data Fig. 4e),  
39 and rescued sub-polar stalk synthesis in the *A. excentricus* *spmX*<sup>-</sup> mutant (Fig. 3e, g).  
40 Strikingly, SpmX<sub>AB(L)-AE(S)</sub> induced sub-polar stalk synthesis in the *A. biprosthecum*  
41 *spmX*<sup>-</sup> mutant (Fig. 3h, j). Similarly, SpmX<sub>AE(S)-AB(L)</sub> functioned like SpmX<sub>AB(L)</sub>: it  
42 induced bi-lateral stalk synthesis in the *A. biprosthecum* *spmX*<sup>-</sup> mutant (Fig. 3i, j),

43 and partially induced stalk synthesis at mostly polar positions in the *A. excentricus*  
44 *spmX*<sup>-</sup> mutant (Fig. 3f, g).

45 In summary, the phenotype of the *spmX*<sup>-</sup> mutants expressing the various  
46 chimeras correlated with the source of their C-terminal region. We conclude that  
47 mutations in the SpmX C-terminal region are responsible for the evolution of SpmX's  
48 ability to drive stalk synthesis from polar to sub-polar to bi-lateral positions.

49

50 **Supplementary Table 1.** Non-parametric statistical analysis of the SpmX  
51 localization profiles and information about primers, plasmids, strains used in the  
52 study. P-values are highlighted in red if <0.05.

53 **Supplementary Table 1a. Comparison of native SpmX localization in *C.***  
54 ***crensetus* (CC), *A. excentricus* (AE), and *A. biprosthecum* (AB) by the KS-test**

|                    | SpmX <sub>AB</sub> | SpmX <sub>CC</sub> | SpmX <sub>AE</sub> |
|--------------------|--------------------|--------------------|--------------------|
| SpmX <sub>AB</sub> | NA                 | 0.00E+00           | 0.00E+00           |
| SpmX <sub>CC</sub> | 0.00E+00           | NA                 | 0.00E+00           |
| SpmX <sub>AE</sub> | 0.00E+00           | 0.00E+00           | NA                 |

55

56 **Supplementary Table 1b. Comparison of native SpmX localization in *C.***  
57 ***crensetus* (CC), *A. excentricus* (AE), and *A. biprosthecum* (AB) by the MW-test**

|                    | SpmX <sub>AB</sub> | SpmX <sub>CC</sub> | SpmX <sub>AE</sub> |
|--------------------|--------------------|--------------------|--------------------|
| SpmX <sub>AB</sub> | NA                 | 2.83E-193          | 4.13E-161          |

|                    |           |          |          |
|--------------------|-----------|----------|----------|
| SpmX <sub>CC</sub> | 2.83E-193 | NA       | 4.13E-23 |
| SpmX <sub>AE</sub> | 4.13E-161 | 4.13E-23 | NA       |

58

59 **Supplementary Table 1c. Comparison of the localization of various SpmX**

60 **expressed in the *A. biprosthicum* *spmX*<sup>-</sup> mutant by the KS-test**

|                       | SpmX <sub>AB</sub> | SpmX <sub>AE-AB</sub> | SpmX <sub>AE</sub> | SpmX <sub>AB-AE</sub> |
|-----------------------|--------------------|-----------------------|--------------------|-----------------------|
| SpmX <sub>AB</sub>    | NA                 | 1.00E+00              | 0.00E+00           | 0.00E+00              |
| SpmX <sub>AE-AB</sub> | 1.00E+00           | NA                    | 0.00E+00           | 0.00E+00              |
| SpmX <sub>AE</sub>    | 0.00E+00           | 0.00E+00              | NA                 | 1.00E+00              |
| SpmX <sub>AB-AE</sub> | 0.00E+00           | 0.00E+00              | 1.00E+00           | NA                    |

61

62 **Supplementary Table 1d. Comparison of the localization of various SpmX**

63 **expressed in the *A. biprosthicum* *spmX*<sup>-</sup> mutant by the MW-test**

|                       | SpmX <sub>AB</sub> | SpmX <sub>AE-AB</sub> | SpmX <sub>AE</sub> | SpmX <sub>AB-AE</sub> |
|-----------------------|--------------------|-----------------------|--------------------|-----------------------|
| SpmX <sub>AB</sub>    | NA                 | 5.58E-01              | 5.81E-58           | 3.09E-50              |
| SpmX <sub>AE-AB</sub> | 5.58E-01           | NA                    | 4.85E-38           | 1.32E-33              |
| SpmX <sub>AE</sub>    | 5.81E-58           | 4.85E-38              | NA                 | 1.00E+00              |
| SpmX <sub>AB-AE</sub> | 3.09E-50           | 1.32E-33              | 1.00E+00           | NA                    |

64

65 **Supplementary Table 1e. Comparison of the localization of various SpmX**

66 **expressed in the *A. excentricus* *spmX*<sup>-</sup> mutant by the KS-test**

|  | SpmX <sub>AB</sub> | SpmX <sub>AE-AB</sub> | SpmX <sub>AE</sub> | SpmX <sub>AB-AE</sub> | SpmX <sub>CC-AE</sub> | SpmX <sub>CC</sub> |
|--|--------------------|-----------------------|--------------------|-----------------------|-----------------------|--------------------|
|--|--------------------|-----------------------|--------------------|-----------------------|-----------------------|--------------------|

|                       |          |          |          |          |          |          |
|-----------------------|----------|----------|----------|----------|----------|----------|
| SpmX <sub>AB</sub>    | NA       | 1.00E+00 | 0.00E+00 | 0.00E+00 | 1.19E-13 | 1.97E-02 |
| SpmX <sub>AE-AB</sub> | 1.00E+00 | NA       | 4.90E-14 | 5.82E-10 | 1.91E-08 | 6.86E-03 |
| SpmX <sub>AE</sub>    | 0.00E+00 | 4.90E-14 | NA       | 1.00E+00 | 1.00E+00 | 0.00E+00 |
| SpmX <sub>AB-AE</sub> | 0.00E+00 | 5.82E-10 | 1.00E+00 | NA       | 1.00E+00 | 0.00E+00 |
| SpmX <sub>CC-AE</sub> | 1.19E-13 | 1.91E-08 | 1.00E+00 | 1.00E+00 | NA       | 0.00E+00 |
| SpmX <sub>CC</sub>    | 1.97E-02 | 6.86E-03 | 0.00E+00 | 0.00E+00 | 0.00E+00 | NA       |

67

68 **Supplementary Table 1f. Comparison of the localization of various SpmX**

69 **expressed in the *A. excrucians* *spmX*<sup>-</sup> mutant by the MW-test**

|                       | SpmX <sub>AB</sub> | SpmX <sub>AE-AB</sub> | SpmX <sub>AE</sub> | SpmX <sub>AB-AE</sub> | SpmX <sub>CC-AE</sub> | SpmX <sub>CC</sub> |
|-----------------------|--------------------|-----------------------|--------------------|-----------------------|-----------------------|--------------------|
| SpmX <sub>AB</sub>    | NA                 | 1.00E+00              | 3.63E-25           | 5.60E-21              | 6.72E-14              | 2.20E-03           |
| SpmX <sub>AE-AB</sub> | 1.00E+00           | NA                    | 2.90E-11           | 1.57E-09              | 1.59E-06              | 3.74E-03           |
| SpmX <sub>AE</sub>    | 3.63E-25           | 2.90E-11              | NA                 | 1.00E+00              | 1.00E+00              | 5.77E-29           |
| SpmX <sub>AB-AE</sub> | 5.60E-21           | 1.57E-09              | 1.00E+00           | NA                    | 1.00E+00              | 3.19E-26           |
| SpmX <sub>CC-AE</sub> | 6.72E-14           | 1.59E-06              | 1.00E+00           | 1.00E+00              | NA                    | 4.95E-20           |
| SpmX <sub>CC</sub>    | 2.20E-03           | 3.74E-03              | 5.77E-29           | 3.19E-26              | 4.95E-20              | NA                 |

70

71 **Supplementary Table 1g. Plasmids**

| YB#  | Plasmid name (resistance) | Reference  |
|------|---------------------------|------------|
| 5899 | pRXGFPC-5(TetR)           | This study |
| 5902 | pRXCHYC-5(TetR)           | This study |

|      |                                                  |            |
|------|--------------------------------------------------|------------|
| 5900 | pRXCFPC-5(TetR)                                  | This study |
| 5901 | pRXYFPC-5(TetR)                                  | This study |
| 5895 | pRXGFPC-2(KanR)                                  | This study |
| 5898 | pRXCHYC-2(KanR)                                  | This study |
| 5896 | pRXCFPC-2(KanR)                                  | This study |
| 5897 | pRXYFPC-2(KanR)                                  | This study |
| 5877 | pBGST18- <i>spmX<sub>AB</sub></i> (KanR)         | This study |
| 5878 | pBGST18- <i>spmX<sub>AE</sub></i> (KanR)         | This study |
| 5881 | pBGST18- <i>divJ<sub>AB</sub></i> (KanR)         | This study |
| 5681 | pGFPC-1- <i>spmX<sub>AB</sub></i> (GentR)        | This study |
| 5682 | pCHYC-1- <i>spmX<sub>AB</sub></i> (GentR)        | This study |
| 5683 | pCFPC-1- <i>spmX<sub>AB</sub></i> (GentR)        | This study |
| 5684 | pGFPC-2- <i>spmX<sub>AB</sub></i> (KanR)         | This study |
| 5685 | pCHYC-2- <i>spmX<sub>AB</sub></i> (KanR)         | This study |
| 5686 | pGFPC-1- <i>spmX<sub>AE</sub></i> (GentR)        | This study |
| 5687 | pCHYC-1- <i>spmX<sub>AE</sub></i> (GentR)        | This study |
| 5688 | pGFPC-1- <i>divJ<sub>AB</sub></i> (GentR)        | This study |
| 5689 | pCHYC-1- <i>divJ<sub>AB</sub></i> (GentR)        | This study |
| 5690 | pCHYC-2- <i>divJ<sub>AB</sub></i> (KanR)         | This study |
| 5691 | pGFPC-2- <i>divJ<sub>AB</sub></i> (KanR)         | This study |
| 5882 | pCHYC-2-1-750aa- <i>spmX<sub>AB</sub></i> (KanR) | This study |
| 5883 | pCHYC-2-1-150aa- <i>spmX<sub>AB</sub></i> (KanR) | This study |
| 5884 | pRXGFPC-5- <i>spmX<sub>AB</sub></i> (TetR)       | This study |

|      |                                                      |            |
|------|------------------------------------------------------|------------|
| 5885 | pRXGFPC-5- <i>spmX<sub>CC-AB</sub></i> (TetR)        | This study |
| 5886 | pRXGFPC-5- <i>spmX<sub>AE</sub></i> (TetR)           | This study |
| 5888 | pRXGFPC-5- <i>spmX<sub>AB-AE</sub></i> (TetR)        | This study |
| 5889 | pRXGFPC-5- <i>spmX<sub>AE-AB</sub></i> (TetR)        | This study |
| 5890 | pRXGFPC-5- <i>spmX<sub>CC</sub></i> (TetR)           | This study |
| 5891 | pRXGFPC-5- <i>spmX<sub>CC-AE</sub></i> (TetR)        | This study |
| 5892 | pRXCHYC-5- <i>spmX<sub>AB</sub></i> (TetR)           | This study |
| 5893 | pRXCHYC-5- <i>spmX<sub>AE</sub></i> (TetR)           | This study |
| 5894 | pRXGFPC-5-150-835aa- <i>spmX<sub>AB</sub></i> (TetR) | This study |
| 7129 | pRXCHYC-5-150-835aa- <i>spmX<sub>AB</sub></i> (TetR) | This study |
| 7142 | pRXMCS-5- <i>spmX<sub>AB</sub></i> (TetR)            | This study |
| 7143 | pRXMCS-5- <i>spmX<sub>AE</sub></i> (TetR)            | This study |
| 7678 | pGFPC-2- <i>spmX<sub>CC</sub></i> (GentR)            | This study |

72

73 **Supplementary Table 1h. Strains**

| YB#   | Genotype (resistance)                 | Reference         |
|-------|---------------------------------------|-------------------|
|       | <b><i>E. coli</i> strains</b>         |                   |
| ----- | Alpha Select - Silver Efficiency      | Bioline USA, Inc. |
|       | <b>Wild type strains</b>              |                   |
| 642   | <i>Asticcacaulis biprosthicum</i> C19 | <sup>1</sup>      |
| 258   | <i>Asticcacaulis excentricus</i> AC48 | <sup>2</sup>      |

|      |                                                                                     |                      |
|------|-------------------------------------------------------------------------------------|----------------------|
| 5874 | <i>Asticcacaulis benevestitus</i> DSM16100                                          | 3                    |
| 135  | <i>Caulobacter crescentus</i> CB15                                                  | 2                    |
| 3927 | <i>Asticcacaulis</i> sp. AC402, isolated from Gull Lake, Michigan                   | Jeanne<br>Poindexter |
| 3929 | <i>Asticcacaulis</i> sp. AC460, isolated from School Street Marsh, Woods            | Jeanne<br>Poindexter |
| 3932 | <i>Asticcacaulis</i> sp. AC466, isolated from School Street Marsh, Woods            | Jeanne<br>Poindexter |
| 5875 | <i>Asticcacaulis</i> sp. YBE204, isolated from a construction pond.                 | This study           |
|      | <b><i>A. biprosthicum</i> strains</b>                                               |                      |
| 5692 | YB642 <i>spmX</i> :: <i>spmX-egfp</i> (GentR)                                       | This study           |
| 5693 | YB642 <i>spmX</i> :: <i>spmX-egfp</i> (KanR)                                        | This study           |
| 5694 | YB642 <i>spmX</i> :: <i>spmX-mcherry</i> (GentR)                                    | This study           |
| 5695 | YB642 <i>spmX</i> :: <i>spmX-mcherry</i> (KanR)                                     | This study           |
| 6606 | YB642 <i>spmX</i> <sup>-</sup> (KanR) insertional gene disruption by pBGTS18        | This study           |
| 6607 | YB6606 <i>spmX</i> <sup>-</sup> pRXGFPC-5- <i>spmX</i> <sub>AB</sub> (TetR KanR)    | This study           |
| 6608 | YB6606 <i>spmX</i> <sup>-</sup> pRXGFPC-5- <i>spmX</i> <sub>AE</sub> (TetR KanR)    | This study           |
| 6610 | YB6606 <i>spmX</i> <sup>-</sup> pRXGFPC-5- <i>spmX</i> <sub>AB-AE</sub> (TetR KanR) | This study           |
| 6611 | YB6606 <i>spmX</i> <sup>-</sup> pRXGFPC-5- <i>spmX</i> <sub>AE-AB</sub> (TetR KanR) | This study           |
| 6612 | YB6606 <i>spmX</i> <sup>-</sup> pRXGFPC-5- <i>spmX</i> <sub>CC</sub> (TetR KanR)    | This study           |
| 6613 | YB6606 <i>spmX</i> <sup>-</sup> pRXGFPC-5- <i>spmX</i> <sub>CC-AE</sub> (TetR KanR) | This study           |
| 6615 | YB642 pRXGFPC-5- <i>spmX</i> <sub>AE</sub> (TetR)                                   | This study           |
| 6616 | YB642 pRXGFPC-5- <i>spmX</i> <sub>AB</sub> (TetR)                                   | This study           |



|      |                                                                                            |            |
|------|--------------------------------------------------------------------------------------------|------------|
| 6618 | YB642 pRXGFPC-5- <i>spmX</i> <sub>AB-AE</sub> (TetR)                                       | This study |
| 6619 | YB642 pRXGFPC-5- <i>spmX</i> <sub>AE-AB</sub> (TetR)                                       | This study |
| 6620 | YB642 pRXGFPC-5- <i>spmX</i> <sub>CC</sub> (TetR)                                          | This study |
| 6621 | YB642 pRXGFPC-5- <i>spmX</i> <sub>CC-AE</sub> (TetR)                                       | This study |
| 6623 | YB642 <i>divJ</i> <sup>-</sup> (KanR) insertional gene disruption by pBGTS18               | This study |
| 6624 | YB642 <i>divJ::divJ-egfp</i> (KanR)                                                        | This study |
| 6625 | YB642 <i>divJ::divJ-egfp</i> (GentR)                                                       | This study |
| 6626 | YB6623 <i>divJ</i> <sup>-</sup> <i>spmX::spmX-egfp</i> (KanR GentR)                        | This study |
| 6656 | YB6606 <i>spmX</i> <sup>-</sup> <i>divJ::divJ-egfp</i> (KanR GentR)                        | This study |
| 6657 | YB642 <i>spmX::1-750aa-spmX-mcherry</i> (KanR)                                             | This study |
| 6658 | YB642 <i>spmX::1-150aa-spmX-mcherry</i> (KanR)                                             | This study |
| 6659 | YB6606 <i>spmX</i> <sup>-</sup> pRXCHYC-5-150-835aa- <i>spmX</i> <sub>AB</sub> (KanR TetR) | This study |
| 6660 | YB6606 <i>spmX</i> <sup>-</sup> pRXGFPC-5-150-835aa- <i>spmX</i> <sub>AB</sub> (KanR TetR) | This study |
| 7144 | YB6606 <i>spmX</i> <sup>-</sup> pRXCHYC-5- <i>spmX</i> <sub>AB</sub> (TetR KanR)           | This study |
| 7145 | YB6606 <i>spmX</i> <sup>-</sup> pRXCHYC-5- <i>spmX</i> <sub>AE</sub> (TetR KanR)           | This study |
| 7146 | YB6606 <i>spmX</i> <sup>-</sup> pXMCS-5- <i>spmX</i> <sub>AB</sub> (TetR KanR)             | This study |
| 7147 | YB6606 <i>spmX</i> <sup>-</sup> pXMCS-5- <i>spmX</i> <sub>AE</sub> (TetR KanR)             | This study |
| 7148 | YB5692 <i>spmX::spmX-egfp</i> pRXCHYC-5- <i>spmX</i> <sub>AB</sub> (GentR TetR)            | This study |
|      | <b>A. excentricus strains</b>                                                              |            |
| 6662 | YB258 <i>spmX::spmX-egfp</i> (GentR)                                                       | This study |
| 6663 | YB258 <i>spmX::spmX-mcherry</i> (GentR)                                                    | This study |
| 6664 | YB258 <i>spmX</i> <sup>-</sup> (KanR) insertional gene disruption by pBGTS18               | This study |
| 6665 | YB6664 <i>spmX</i> <sup>-</sup> pRXGFPC-5- <i>spmX</i> <sub>AB</sub> (TetR KanR)           | This study |

|      |                                                                                          |            |
|------|------------------------------------------------------------------------------------------|------------|
| 6666 | YB6664 <i>spmX</i> <sup>-</sup> pRXGFPC-5- <i>spmX</i> <sub>AE</sub> (TetR KanR)         | This study |
| 6668 | YB6664 <i>spmX</i> <sup>-</sup> pRXGFPC-5- <i>spmX</i> <sub>AB-AE</sub> (TetR KanR)      | This study |
| 6669 | YB6664 <i>spmX</i> <sup>-</sup> pRXGFPC-5- <i>spmX</i> <sub>AE-AB</sub> (TetR KanR)      | This study |
| 6670 | YB6664 <i>spmX</i> <sup>-</sup> pRXGFPC-5- <i>spmX</i> <sub>CC</sub> (TetR KanR)         | This study |
| 6671 | YB6664 <i>spmX</i> <sup>-</sup> pRXGFPC-5- <i>spmX</i> <sub>CC-AE</sub> (TetR KanR)      | This study |
| 6673 | YB258 pRXGFPC-5- <i>spmX</i> <sub>AE</sub> (TetR)                                        | This study |
| 6674 | YB258 pRXGFPC-5- <i>spmX</i> <sub>AB</sub> (TetR)                                        | This study |
| 6676 | YB258 pRXGFPC-5- <i>spmX</i> <sub>AB-AE</sub> (TetR)                                     | This study |
| 6677 | YB258 pRXGFPC-5- <i>spmX</i> <sub>AE-AB</sub> (TetR)                                     | This study |
| 6908 | YB258 pRXGFPC-5- <i>spmX</i> <sub>CC</sub> (TetR)                                        | This study |
| 6909 | YB258 pRXGFPC-5- <i>spmX</i> <sub>CC-AE</sub> (TetR)                                     | This study |
| 7149 | YB6664 <i>spmX</i> <sup>-</sup> pRXCHYC-5- <i>spmX</i> <sub>AB</sub> (TetR KanR)         | This study |
| 7150 | YB6664 <i>spmX</i> <sup>-</sup> pRXCHYC-5- <i>spmX</i> <sub>AE</sub> (TetR KanR)         | This study |
| 7151 | YB6664 <i>spmX</i> <sup>-</sup> pRXMCS-5- <i>spmX</i> <sub>AB</sub> (TetR KanR)          | This study |
| 7152 | YB6664 <i>spmX</i> <sup>-</sup> pRXMCS-5- <i>spmX</i> <sub>AE</sub> (TetR KanR)          | This study |
| 7153 | YB258 pRXCHYC-5- <i>spmX</i> <sub>AE</sub> (TetR)                                        | This study |
| 7154 | YB258 pRXMCS-5- <i>spmX</i> <sub>AE</sub> (TetR)                                         | This study |
| 7155 | YB6662 <i>spmX</i> :: <i>spmX-egfp</i> pRXCHYC-5- <i>spmX</i> <sub>AE</sub> (TetR GentR) | This study |
|      | <b><i>C. crescentus</i> strain</b>                                                       |            |
| 6556 | <i>spmX</i> :: <i>spmX-mcherry</i>                                                       | 4          |
| 5873 | $\Delta$ <i>spmX</i>                                                                     | 4          |
| 7677 | <i>spmX</i> :: <i>spmX-egfp</i> (GentR)                                                  | This study |
| 6920 | YB5873 $\Delta$ <i>spmX</i> pRXGFPC-5- <i>spmX</i> <sub>AB</sub> (TetR)                  | This study |

|      |                                                                           |            |
|------|---------------------------------------------------------------------------|------------|
| 7131 | YB5873 $\Delta$ <i>spmX</i> pRXGFPC-5- <i>spmX<sub>AE</sub></i> (TetR)    | This study |
| 7156 | YB5873 $\Delta$ <i>spmX</i> pRXGFPC-5- <i>spmX<sub>CC-AE</sub></i> (TetR) | This study |
| 7134 | YB135 pRXGFPC-5- <i>spmX<sub>AB</sub></i> (TetR)                          | This study |
| 7133 | YB135 pRXGFPC-5- <i>spmX<sub>AE</sub></i> (TetR)                          | This study |
| 7157 | YB135 pRXGFPC-5- <i>spmX<sub>CC-AE</sub></i> (TetR)                       | This study |
| 7158 | YB5873 $\Delta$ <i>spmX</i> pRXGFPC-5- <i>spmX<sub>CC</sub></i> (TetR)    | This study |

74

75 **Supplementary Table 1i. Oligonucleotides**

|                 |                                            |
|-----------------|--------------------------------------------|
| ABspmXXfNdeI    | GATACCATATGAGAGCGCGTCAAAAGGTTTC            |
| ABspmXXfRKpnI   | CTGGTACCTAAGTCCTTGAGGCCGC                  |
| AEspmXXfNdeI    | GATACCATATGAGAGCGCGCCATAAAATCTC            |
| AEspmXXfRKpnI   | CGTCGGTACCTAAGTCCTTCAAACCACCTA             |
| CCspmXXfNdeI    | GACACCATATGAAACCGCGTCATCAGG                |
| CCspmXXfRAfII   | CAACTTAAGGTCAACTCTTCGTCGCTCACA             |
| ABspmXXfIRAfIII | CAACTTAAGGTTAAGTCCTTGAGGCCGC               |
| AEspmXXfIRAfIII | CAACTTAAGGTTAAGTCCTTCAAACCACCTA            |
| ABspmXmuraR     | ATC CGG TGT CAG GAA CAG GTT CTT TTC GGC GG |
| AEspmXmuraR     | ATC CGG TGT CAG GAA CAG GCT CTT TTC AGA GG |
| ABspmXperiF     | CTGTTCCCTGACACCGGATGAAGCCTCCGGCAA          |
| AEspmXperiF     | CTGTTCCCTGACACCGGATATGGAGGGGATGGA          |
| CCspmXmuraR     | ATCCGGTGTCAGGAACAGAGTCTTCTCGGC             |
| CCspmXperiF     | CTGTTCCCTGACACCGGATAACGGCGAATGGGTCC        |

|                    |                                  |
|--------------------|----------------------------------|
| ABspmXcterfFKpnI   | CGGGTACCAATCCCTATGCCAAGCCCCTT    |
| ABspmXcterfRSaI    | CGGAGCTCGACAGTCCTTGAGGCCGCCAA    |
| ABdivJcterfFKpnI   | GGGGTACCAACCTTCGACCTGCGCGAG      |
| ABdivJcterfREcoRI  | CGGAATTCCTTCTTCGGCGGGCGGATG      |
| AEspmXcterfFKpnI   | CGGGTACCGGACGACGAGGTAGAGGATG     |
| AEspmXcterfRSaI    | GAGAGCTCGTAAGTCCTTCAAACCACCTA    |
| ABspmXNterdelFNdel | GATAGCATATGGACGAAGCCTCCGGCAATGC  |
| ABspmXNterdelRKpnI | CGGGTACCTAAGTCCTTGAGGCCGCCA      |
| ABSpmXTMdelFKpnI   | CAGGTACCCGCTGACACCGACTCCGAC      |
| ABSpmXTMdelRSaI    | GAGAGCTCGAGTCTCGTCCGCCGACAGGG    |
| ABspmXcterdelFKpnI | CGGGTACCATGAGAGCGCGTCAAAGGTTTC   |
| ABspmXcterdelRSaI  | GAGAGCTCGCGGCGTCAGAAACAGGTTCTTT  |
| ABspmXIKOFpStI     | AGACTGCAGGGGACGAAGCCCAGCAGGATA   |
| ABspmXIKORSaI      | GAGAGCTCTTACTCTTCGTCGCTGGGCTGGCT |
| AEspmXIKOFKpnI     | CAGGTACCCCAAAGCCCCTCATCACAC      |
| AEspmXIKORSaI      | GAGAGCTCCCAGAGCCTGAGCCTGACGC     |
| AEspmXRKpnI        | CGTCGGTACCTCAGTCCTTCAAACCACCTA   |
| ABspmXRKpnI        | GTCGGTACCTCAGTCCTTGAGGCCG        |

76 Sequencing primers are not included in this list.

77

78

79

80 **References:**

- 81 1 Pate, J. L. & Ordal, E. J. The fine structure of two unusual stalked bacteria. *J Cell Biol* **27**,  
82 133-150 (1965).
- 83 2 Poindexter, J. S. Biological Properties and Classification of the Caulobacter Group.  
84 *Bacteriol Rev* **28**, 231-295 (1964).
- 85 3 Vasilyeva, L. V. *et al.* Asticcacaulis benevestitus sp. nov., a psychrotolerant, dimorphic,  
86 prosthecate bacterium from tundra wetland soil. *International journal of systematic and*  
87 *evolutionary microbiology* **56**, 2083-2088, doi:10.1099/ijs.0.64122-0 (2006).
- 88 4 Radhakrishnan, S. K., Thanbichler, M. & Viollier, P. H. The dynamic interplay between a  
89 cell fate determinant and a lysozyme homolog drives the asymmetric division cycle of  
90 *Caulobacter crescentus*. *Genes Dev* **22**, 212-225, doi:22/2/212 [pii]  
91 10.1101/gad.1601808 (2008).

92

93
